# Supplementary material for: The Magnitude of Cardiovascular Disease Risk Factors in Seafarers from 1994 to 2021: A Systematic Review and Meta-Analysis
Source: MDPI journal article supplement (doi:10.3390/jpm13050861), 2023-05-20
Supplement: s1 [file s1]

## Supplementary Figure:

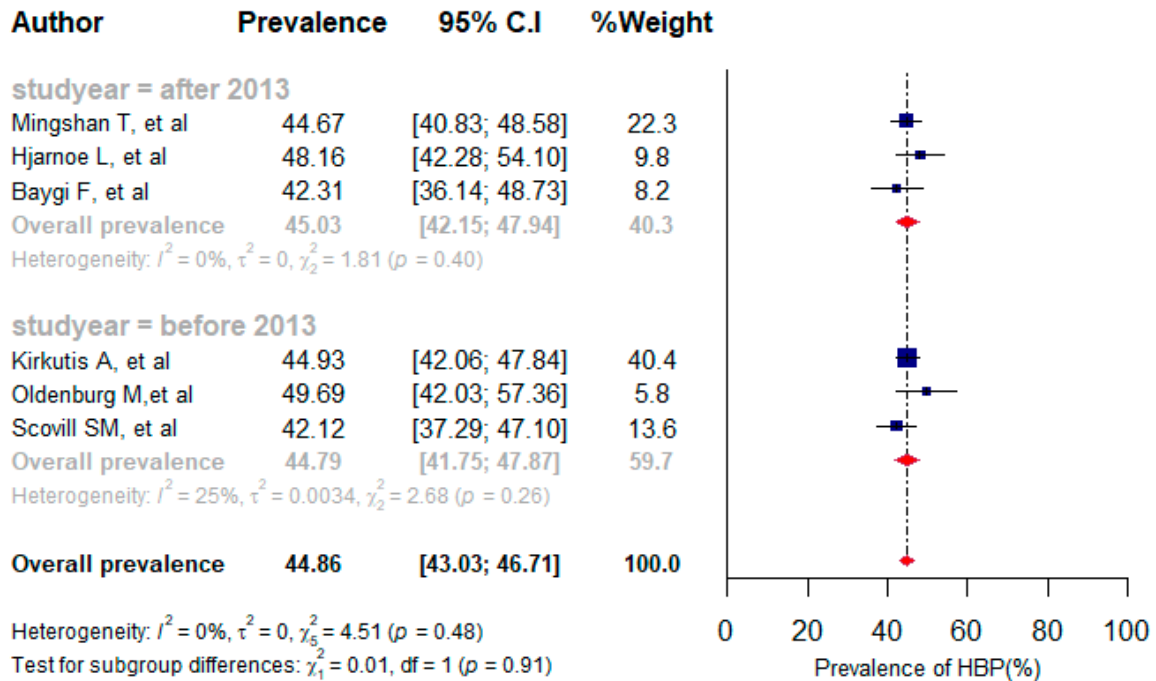

Supplementary Figure 1. A forest plot of the prevalence (%) of high blood pressure among seafarers after omitting the outlier studies.

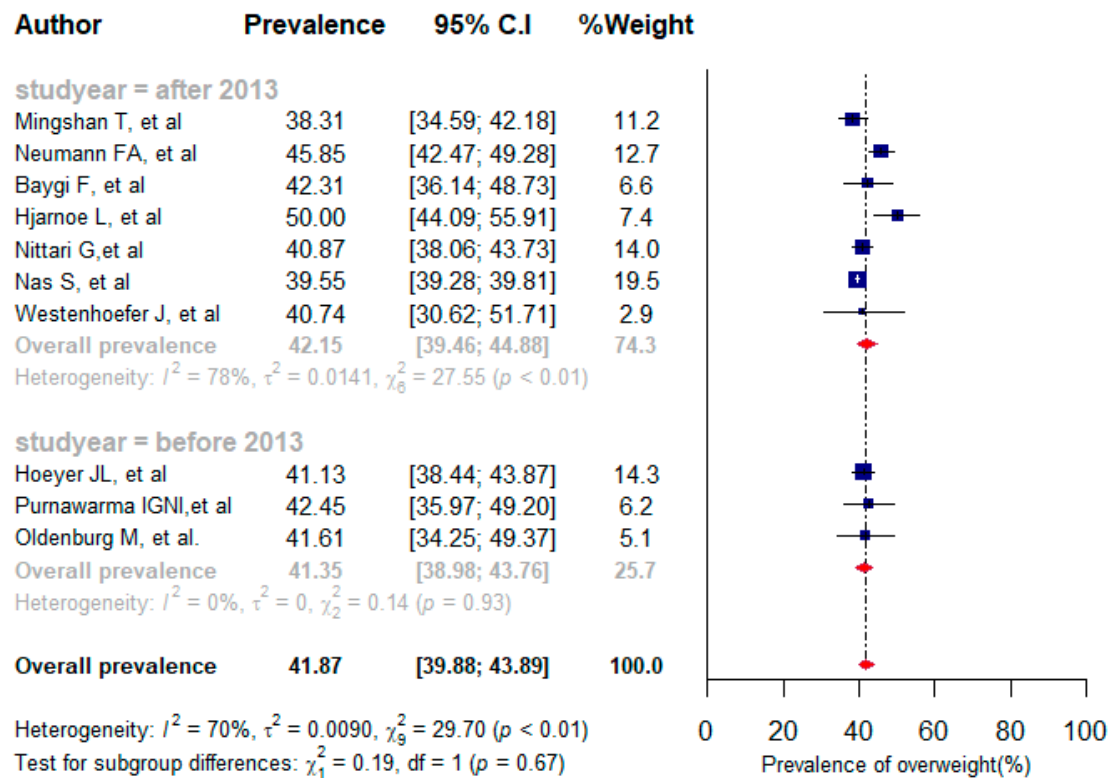

Supplementary Figure 2. A forest plot of the prevalence (%) of overweight among seafarers after omitting the outlier studies.

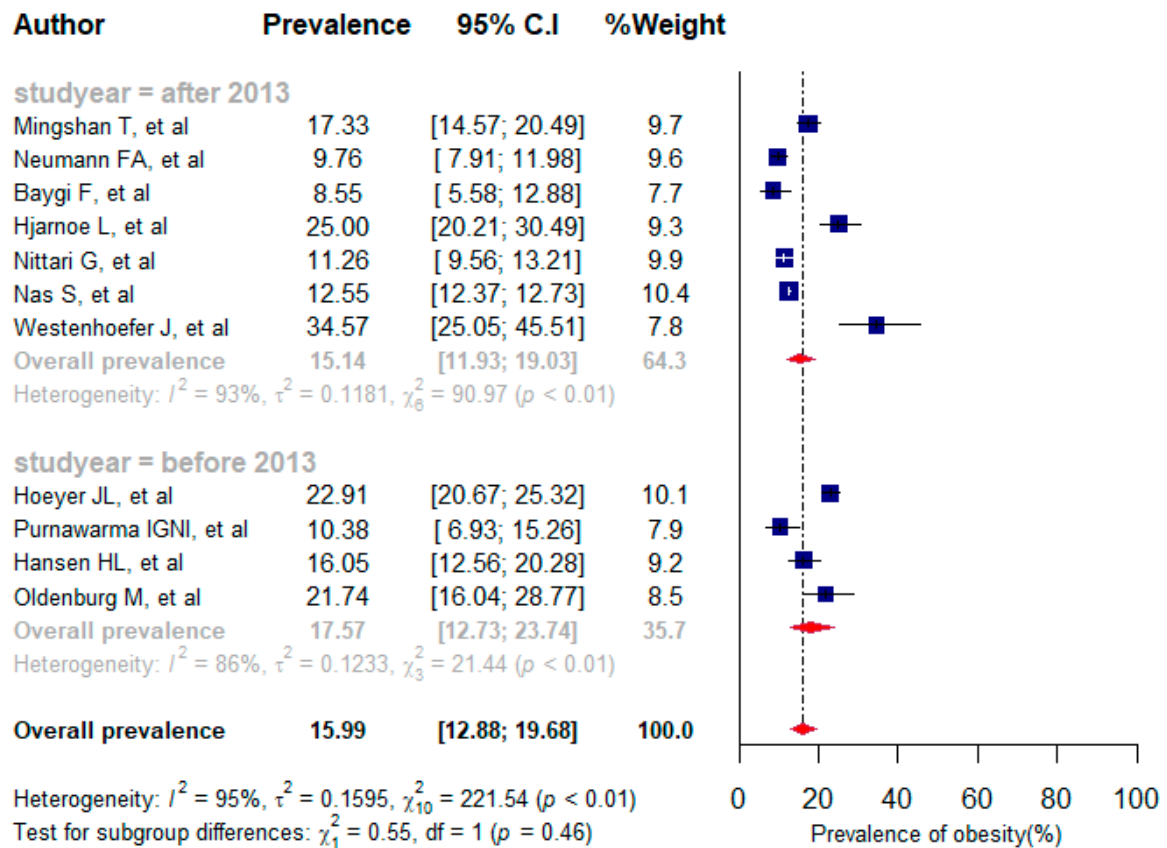

Supplementary Figure 3. A forest plot of the prevalence (%) of obesity among seafarers after omitting the outlier studies.

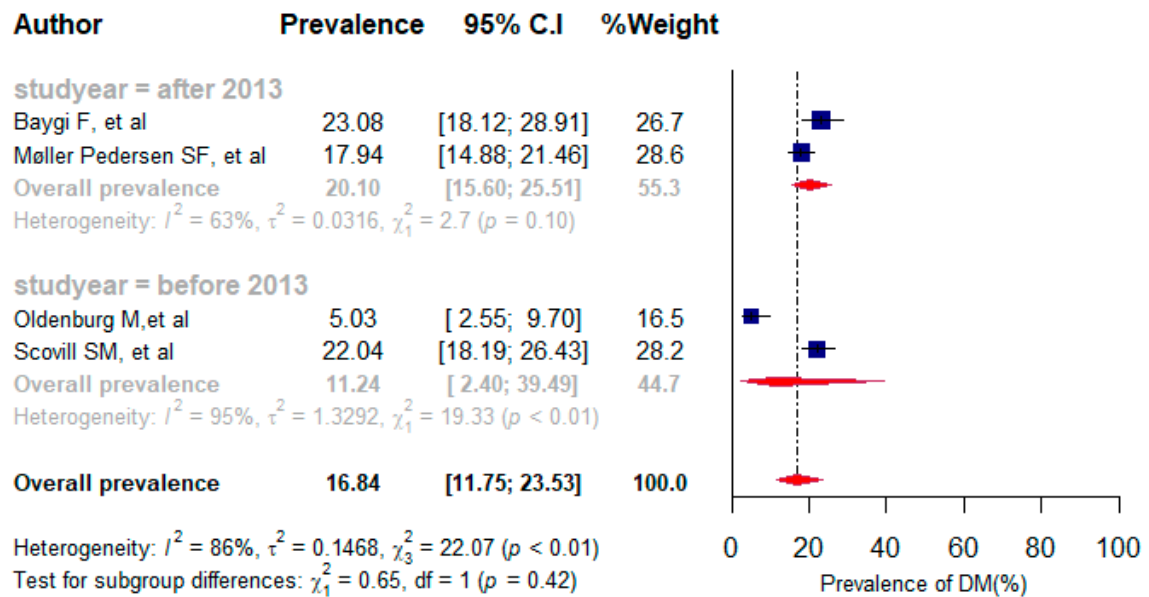

Supplementary Figure 4. A forest plot of the prevalence (%) of diabetes mellitus among seafarers after omitting the outlier studies.

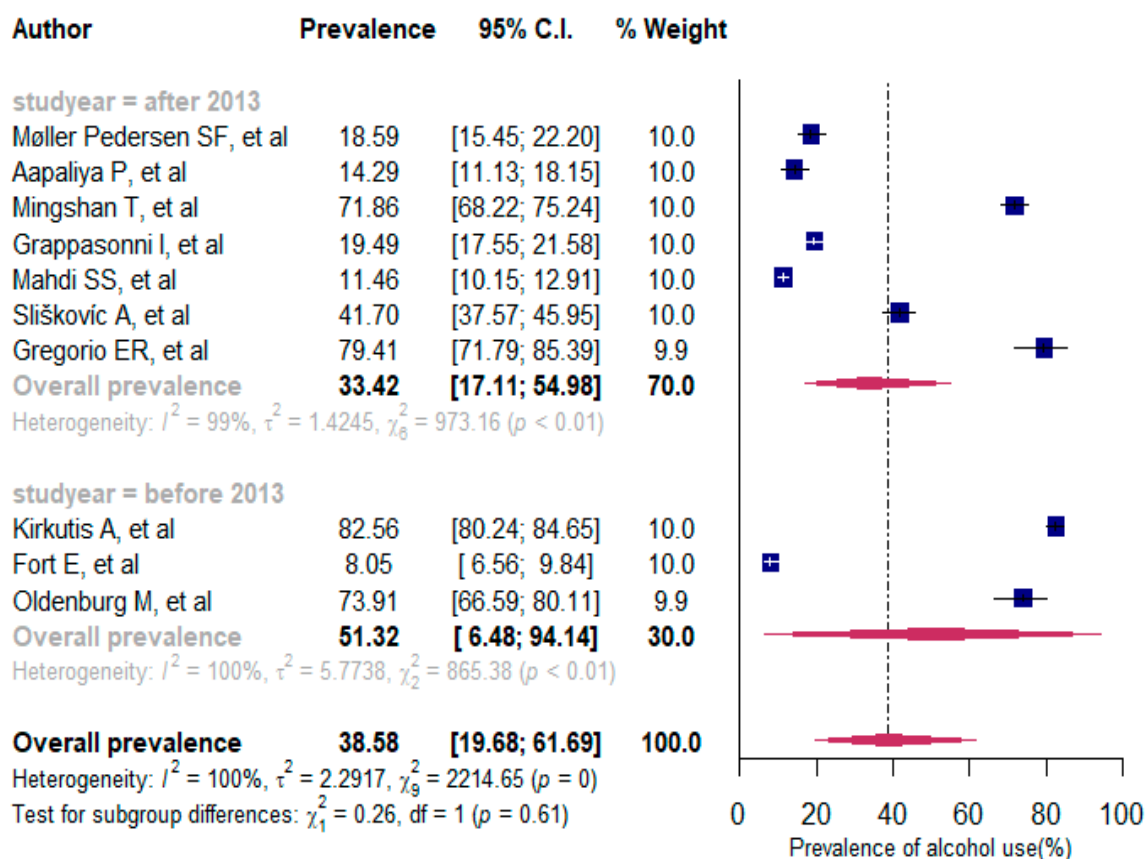

Supplementary Figure 5. A forest plot of the prevalence (%) of alcohol use among seafarers using a random effect model.
