# Supplementary material for: The Magnitude of Cardiovascular Disease Risk Factors in Seafarers from 1994 to 2021: A Systematic Review and Meta-Analysis
Source: MDPI journal article supplement (doi:10.3390/jpm13050861), 2023-05-20
Supplement: s1 [file s1]

## Supplementary Table:

**Supplementary Table 1. Literature Search strategies and results**

| Database | Themes              | Search key words and combinations                                                                                                                                                                                                                                                                                                                                                       | Results |
|----------|---------------------|-----------------------------------------------------------------------------------------------------------------------------------------------------------------------------------------------------------------------------------------------------------------------------------------------------------------------------------------------------------------------------------------|---------|
| PubMed   | High blood pressure | ((("Prevalence"[Title/Abstract] OR "proportion"[Title/Abstract] OR "magnitude"[Title/Abstract]) AND "high blood pressure"[Title/Abstract]) OR "hypertension"[Title/Abstract]) AND "seafarers"[Title/Abstract]) OR "sailing seafarers"[Title/Abstract] OR "onboard ships"[Title/Abstract] OR "merchant ships"[Title/Abstract]                                                            | 144     |
|          | Overweight          | ((("Prevalence"[Title/Abstract] OR "proportion"[Title/Abstract] OR "magnitude"[Title/Abstract]) AND "overweight"[Title/Abstract]) OR "high body mass index"[Title/Abstract]) AND "seafarers"[Title/Abstract]) OR "sailing seafarers"[Title/Abstract] OR "onboard ships"[Title/Abstract] OR "merchant ships"[Title/Abstract]                                                             | 133     |
|          | Obesity             | ((("Prevalence"[Title/Abstract] OR "proportion"[Title/Abstract] OR "magnitude"[Title/Abstract]) AND "obesity"[Title/Abstract]) OR "high body mass index"[Title/Abstract]) AND "seafarers"[Title/Abstract]) OR "sailing seafarers"[Title/Abstract] OR "onboard ships"[Title/Abstract] OR "merchant ships"[Title/Abstract]                                                                | 141     |
|          | Smoking             | ((("Prevalence"[Title/Abstract] OR "proportion"[Title/Abstract] OR "magnitude"[Title/Abstract]) AND "smoking"[Title/Abstract]) OR "cigarette smoking"[Title/Abstract] OR "tobacco"[Title/Abstract] OR "tobacco smoking"[Title/Abstract]) AND "seafarers"[Title/Abstract]) OR "sailing seafarers"[Title/Abstract] OR "onboard ships"[Title/Abstract] OR "merchant ships"[Title/Abstract] | 152     |

|        |                     |                                                                                                                                                                                                                                                                                                                                                                                                               |     |
|--------|---------------------|---------------------------------------------------------------------------------------------------------------------------------------------------------------------------------------------------------------------------------------------------------------------------------------------------------------------------------------------------------------------------------------------------------------|-----|
|        | Diabetes mellitus   | ((("Prevalence"[Title/Abstract] OR "proportion"[Title/Abstract] OR "magnitude"[Title/Abstract]) AND "diabetes"[Title/Abstract]) OR "diabetes mellitus"[Title/Abstract] OR "blood glucose level"[Title/Abstract]) AND "seafarers"[Title/Abstract]) OR "sailing seafarers"[Title/Abstract] OR "onboard ships"[Title/Abstract] OR "merchant ships"[Title/Abstract]                                               | 136 |
|        | Alcohol consumption | ((("prevalence"[Title/Abstract] OR "proportion"[Title/Abstract] OR "magnitude"[Title/Abstract]) AND "alcohol"[Title/Abstract]) OR "alcoholism"[Title/Abstract] OR "alcoholate"[Title/Abstract] OR "alcoholic"[Title/Abstract] OR "alcoholics"[Title/Abstract]) AND "seafarers"[Title/Abstract]) OR "sailing seafarers"[Title/Abstract] OR "onboard ships"[Title/Abstract] OR "merchant ships"[Title/Abstract] | 135 |
| Scopus | High blood pressure | TITLE-ABS KEY ( "prevalence" OR "proportion" OR "magnitude" AND "high bloodpressure" OR "hypertension" AND "seafarers" OR "sailors" OR "onboard ships" OR "merchant ships" )                                                                                                                                                                                                                                  | 25  |
|        | Overweight          | TITLE-ABS KEY ( "prevalence" OR "proportion" OR "magnitude" AND "overweight" OR "high body mass index" AND "seafarers" OR "sailors" OR "onboard ships" OR "merchant ships" )                                                                                                                                                                                                                                  | 13  |
|        | Obesity             | TITLE-ABS KEY ( "prevalence" OR "proportion" OR "magnitude" AND "obesity" OR "high body mass index" AND "seafarers" OR "sailors" OR "onboard ships" OR "merchant ships" )                                                                                                                                                                                                                                     | 24  |
|        | Smoking             | TITLE-ABS KEY ( "prevalence" OR "proportion" OR "magnitude" AND "smoking" OR "cigarette smoking" OR "tobacco" OR "tobacco smoking" AND "seafarers" OR "sailors" OR "onboard ships" OR "merchant ships" )                                                                                                                                                                                                      | 38  |
|        | Diabetes mellitus   | TITLE-ABS-KEY ( "prevalence" OR "proportion" OR "magnitude" AND "diabetes" OR "diabetes mellitus" OR "blood glucose level" AND "seafarers" OR "sailors" OR "onboard ships" OR "merchant ships" )                                                                                                                                                                                                              | 15  |

|  |                        |                                                                                                                                                                                                                  |    |
|--|------------------------|------------------------------------------------------------------------------------------------------------------------------------------------------------------------------------------------------------------|----|
|  | Alcohol<br>consumption | TITLE-ABS KEY ( "prevalence" OR "proportion" OR "magnitude" AND "alcohol" OR<br>"alcoholism" OR "alcoholic" OR "alcoholate" OR "alcoholics" AND "seafarers" OR<br>"sailing" OR "onboard OR "ships" OR "vessels") | 13 |
|--|------------------------|------------------------------------------------------------------------------------------------------------------------------------------------------------------------------------------------------------------|----|

**Supplementary Table 2. The Joanna Briggs Institute (JBI) Prevalence Critical Appraisal Tool**

| S.No | Criteria                                                                                  | Yes | No | Unclear | Not applicable |
|------|-------------------------------------------------------------------------------------------|-----|----|---------|----------------|
| 1    | Was the sample representative of the target population?                                   |     |    |         |                |
| 2    | Were study participants recruited in an appropriate way?                                  |     |    |         |                |
| 3    | Was the sample size adequate?                                                             |     |    |         |                |
| 4    | Were the study subjects and the setting described in detail?                              |     |    |         |                |
| 5    | Was the data analysis conducted with sufficient coverage of the identified sample?        |     |    |         |                |
| 6    | Were objective, standard criteria used for the measurement of the condition?              |     |    |         |                |
| 7    | Was the condition measured reliably?                                                      |     |    |         |                |
| 8    | Was there appropriate statistical analysis?                                               |     |    |         |                |
| 9    | Are all important confounding factors/subgroups/differences identified and accounted for? |     |    |         |                |
| 10   | Were subpopulations identified using objective criteria?                                  |     |    |         |                |

**Supplementary Table 3. Leave-one-out analysis for prevalence of smoking in seafarers.**

|    | estimate | zval    | pval   | ci.lb  | ci.ub  | Q        | Qp | tau2   | I2      | H2      |
|----|----------|---------|--------|--------|--------|----------|----|--------|---------|---------|
| 1  | 0.4082   | -2.8194 | 0.0048 | 0.3477 | 0.4717 | 573.7180 | 0  | 0.2485 | 97.5598 | 40.9799 |
| 2  | 0.4124   | -2.7480 | 0.0060 | 0.3528 | 0.4746 | 559.1361 | 0  | 0.2378 | 97.4961 | 39.9383 |
| 3  | 0.4139   | -2.7860 | 0.0053 | 0.3560 | 0.4742 | 513.9905 | 0  | 0.2223 | 97.2762 | 36.7136 |
| 4  | 0.4098   | -2.9221 | 0.0035 | 0.3522 | 0.4700 | 472.8460 | 0  | 0.2218 | 97.0392 | 33.7747 |
| 5  | 0.3913   | -3.3370 | 0.0008 | 0.3315 | 0.4546 | 538.1938 | 0  | 0.2509 | 97.3987 | 38.4424 |
| 6  | 0.3907   | -3.5326 | 0.0004 | 0.3339 | 0.4507 | 445.0794 | 0  | 0.2252 | 96.8545 | 31.7914 |
| 7  | 0.3983   | -2.8362 | 0.0046 | 0.3324 | 0.4682 | 608.5814 | 0  | 0.3051 | 97.6996 | 43.4701 |
| 8  | 0.4099   | -2.7776 | 0.0055 | 0.3496 | 0.4732 | 586.8265 | 0  | 0.2469 | 97.6143 | 41.9162 |
| 9  | 0.4007   | -2.8806 | 0.0004 | 0.3370 | 0.4679 | 606.8214 | 0  | 0.2811 | 97.6929 | 43.3444 |
| 10 | 0.3989   | -3.0436 | 0.0023 | 0.3376 | 0.4636 | 609.4842 | 0  | 0.2609 | 97.7030 | 43.5346 |
| 11 | 0.4032   | -2.9506 | 0.0032 | 0.3424 | 0.4671 | 607.0490 | 0  | 0.2545 | 97.6938 | 43.3606 |
| 12 | 0.3966   | -3.1410 | 0.0017 | 0.3359 | 0.4606 | 607.9238 | 0  | 0.2567 | 97.6971 | 43.4231 |
| 13 | 0.4007   | -2.9814 | 0.0029 | 0.3391 | 0.4656 | 608.6608 | 0  | 0.2619 | 97.6999 | 43.4758 |
| 14 | 0.4000   | -2.9770 | 0.0029 | 0.3380 | 0.4654 | 609.1341 | 0  | 0.2664 | 97.7017 | 43.5096 |
| 15 | 0.3838   | -3.7830 | 0.0002 | 0.3276 | 0.4432 | 523.7089 | 0  | 0.2237 | 97.3268 | 37.4078 |
| 16 | 0.4039   | -2.9340 | 0.0033 | 0.3432 | 0.4678 | 606.5165 | 0  | 0.2536 | 97.6917 | 43.3226 |

**Supplementary Table 4. Leave-one-out diagnostics with a built-in function in smoking prevalence among seafarers.**

|    | rstudent | dffits  | cook.d | cov.r  | tau2.del | QE.del   | hat    | weight | dfbs    | inf |
|----|----------|---------|--------|--------|----------|----------|--------|--------|---------|-----|
| 1  | -0.8597  | -0.2233 | 0.0495 | 1.0584 | 0.2485   | 573.7180 | 0.0631 | 6.3085 | -0.2233 |     |
| 2  | -1.4177  | -0.3656 | 0.1272 | 1.0134 | 0.2378   | 559.1361 | 0.0619 | 6.1944 | -0.3657 |     |
| 3  | -1.6373  | -0.4293 | 0.1641 | 0.9517 | 0.2223   | 513.9905 | 0.0631 | 6.3144 | -0.4290 |     |
| 4  | -1.0857  | -0.2900 | 0.0745 | 0.9512 | 0.2218   | 472.8460 | 0.0645 | 6.4503 | -0.2895 |     |
| 5  | 1.2506   | 0.3282  | 0.1078 | 1.0697 | 0.2509   | 538.1938 | 0.0644 | 6.4433 | 0.3282  |     |
| 6  | 1.4001   | 0.3669  | 0.1210 | 0.9653 | 0.2252   | 445.0794 | 0.0648 | 6.4839 | 0.3662  |     |
| 7  | 0.3269   | 0.0900  | 0.0098 | 1.2906 | 0.3051   | 608.5814 | 0.0648 | 6.4782 | 0.0903  |     |
| 8  | -1.1071  | -0.2805 | 0.0776 | 1.0486 | 0.2469   | 586.8265 | 0.0602 | 6.0231 | -0.2806 |     |
| 9  | 0.0709   | 0.0214  | 0.0005 | 1.1924 | 0.2811   | 606.8214 | 0.0644 | 6.4355 | 0.0214  |     |
| 10 | 0.3041   | 0.0795  | 0.0066 | 1.1081 | 0.2609   | 609.4842 | 0.0623 | 6.2335 | 0.0795  |     |
| 11 | -0.2353  | -0.0586 | 0.0035 | 1.0783 | 0.2545   | 607.0490 | 0.0591 | 5.9087 | -0.0586 |     |
| 12 | 0.6003   | 0.1534  | 0.0241 | 1.0891 | 0.2567   | 607.9238 | 0.0608 | 6.0766 | 0.1534  |     |
| 13 | 0.0780   | 0.0213  | 0.0005 | 1.1125 | 0.2619   | 608.6608 | 0.0627 | 6.2680 | 0.0213  |     |
| 14 | 0.1584   | 0.0428  | 0.0019 | 1.1317 | 0.2664   | 609.1341 | 0.0634 | 6.3391 | 0.0428  |     |
| 15 | 2.3750   | 0.6093  | 0.3331 | 0.9566 | 0.2237   | 523.7089 | 0.0625 | 6.2452 | 0.6094  |     |
| 16 | -0.3362  | -0.0832 | 0.0070 | 1.0731 | 0.2536   | 606.5165 | 0.0580 | 5.7972 | -0.0831 |     |

**Supplementary Table 5. Leave-one-out analysis for prevalence of high blood pressure in seafarers.**

|   | estimate | zval    | pval   | ci.lb  | ci.ub  | Q        | Qp | tau2   | I2      | H2      |
|---|----------|---------|--------|--------|--------|----------|----|--------|---------|---------|
| 1 | 0.4536   | -0.8738 | 0.3822 | 0.3535 | 0.5576 | 164.4557 | 0  | 0.3025 | 96.3516 | 27.4093 |
| 2 | 0.4489   | -1.0275 | 0.3042 | 0.3551 | 0.5464 | 166.2604 | 0  | 0.2652 | 96.3912 | 27.7101 |
| 3 | 0.4182   | -3.0000 | 0.0027 | 0.3669 | 0.4714 | 45.7007  | 0  | 0.0704 | 86.8711 | 7.6168  |
| 4 | 0.4572   | -0.8724 | 0.3830 | 0.3643 | 0.5532 | 164.0072 | 0  | 0.2566 | 96.3416 | 27.3345 |
| 5 | 0.4530   | -0.8352 | 0.4036 | 0.3472 | 0.5632 | 162.9707 | 0  | 0.3412 | 96.3184 | 27.1618 |
| 6 | 0.4471   | -1.0921 | 0.2748 | 0.3558 | 0.5421 | 165.9465 | 0  | 0.2522 | 96.3844 | 27.6577 |
| 7 | 0.4908   | -0.2302 | 0.8179 | 0.4131 | 0.5689 | 113.2739 | 0  | 0.1678 | 94.7031 | 18.8790 |
| 8 | 0.4575   | -0.8443 | 0.3985 | 0.3623 | 0.5560 | 161.9363 | 0  | 0.2699 | 96.2948 | 26.9894 |

**Supplementary Table 6. Leave-one-out diagnostics with a built-in function in high blood pressure among seafarers.**

|   | rstudent | dfits   | cook.d | cov.r  | tau2.del | QE.del   | hat    | weight  | dfbs    | inf |
|---|----------|---------|--------|--------|----------|----------|--------|---------|---------|-----|
| 1 | -0.0465  | -0.0082 | 0.0001 | 1.4623 | 0.3025   | 164.4557 | 0.1290 | 12.8991 | -0.0083 |     |
| 2 | 0.2328   | 0.0931  | 0.0097 | 1.2849 | 0.2652   | 166.2604 | 0.1247 | 12.4694 | 0.0931  |     |
| 3 | 3.9542   | 1.4117  | 0.6517 | 0.3899 | 0.0704   | 45.7007  | 0.1275 | 12.7544 | 1.3876  | *   |
| 4 | -0.2481  | -0.0892 | 0.0087 | 1.2437 | 0.2566   | 164.0072 | 0.1233 | 12.3316 | -0.0892 |     |
| 5 | -0.0234  | 0.0036  | 0      | 1.6424 | 0.3412   | 162.9707 | 0.1305 | 13.0548 | 0.0036  |     |
| 6 | 0.3565   | 0.1352  | 0.0195 | 1.2190 | 0.2522   | 165.9465 | 0.1198 | 11.9824 | 0.1350  |     |
| 7 | -2.7068  | -0.9913 | 0.7337 | 0.8279 | 0.1678   | 113.2739 | 0.1183 | 11.8288 | -1.0012 | *   |
| 8 | -0.2605  | -0.0933 | 0.0100 | 1.3095 | 0.2699   | 161.9363 | 0.1268 | 12.6796 | -0.0933 |     |

**Supplementary Table 7. Leave-one-out analysis for prevalence of overweight in seafarers.**

|    | estimate | zval    | pval | ci.lb  | ci.ub  | Q       | Qp | tau2   | I2      | H2     |
|----|----------|---------|------|--------|--------|---------|----|--------|---------|--------|
| 1  | 0.4203   | -5.4943 | 0    | 0.3927 | 0.4485 | 70.7570 | 0  | 0.0261 | 85.8671 | 7.0757 |
| 2  | 0.4119   | -6.4982 | 0    | 0.3862 | 0.4382 | 57.9860 | 0  | 0.0216 | 82.7545 | 5.7986 |
| 3  | 0.4162   | -6.0279 | 0    | 0.3898 | 0.4432 | 70.5263 | 0  | 0.0242 | 85.8209 | 7.0526 |
| 4  | 0.4100   | -6.9552 | 0    | 0.3855 | 0.4351 | 59.1779 | 0  | 0.0198 | 83.1018 | 5.9178 |
| 5  | 0.4178   | -5.4164 | 0    | 0.3889 | 0.4473 | 70.4925 | 0  | 0.0291 | 85.8141 | 7.0493 |
| 6  | 0.4197   | -4.5194 | 0    | 0.3859 | 0.4542 | 59.4419 | 0  | 0.0433 | 83.1769 | 5.9442 |
| 7  | 0.4171   | -6.1067 | 0    | 0.3912 | 0.4434 | 71.1809 | 0  | 0.0238 | 85.9513 | 7.1181 |
| 8  | 0.4175   | -5.3999 | 0    | 0.3884 | 0.4472 | 70.0482 | 0  | 0.0296 | 85.7241 | 7.0048 |
| 9  | 0.4161   | -6.0531 | 0    | 0.3898 | 0.4430 | 70.5214 | 0  | 0.0241 | 85.8199 | 7.0521 |
| 10 | 0.4284   | -5.8995 | 0    | 0.4051 | 0.4520 | 50.0223 | 0  | 0.0163 | 80.0089 | 5.0022 |
| 11 | 0.4079   | -7.5392 | 0    | 0.3847 | 0.4315 | 50.7933 | 0  | 0.0167 | 80.3124 | 5.0793 |
| 12 | 0.4167   | -6.0421 | 0    | 0.3905 | 0.4435 | 70.9597 | 0  | 0.0240 | 85.9075 | 7.0960 |



**Supplementary Table 8. Leave-one-out diagnostics with a built-in function in overweight prevalence among seafarers.**

|    | rstudent | dffits  | cook.d | cov.r  | tau2.del | QE.del  | hat    | weight  | dfbs    | inf |
|----|----------|---------|--------|--------|----------|---------|--------|---------|---------|-----|
| 1  | -0.8125  | -0.2693 | 0.0800 | 1.2108 | 0.0261   | 70.7570 | 0.0949 | 9.4897  | -0.2700 |     |
| 2  | 1.1045   | 0.3774  | 0.1351 | 1.0618 | 0.0216   | 57.9860 | 0.1011 | 10.1053 | 0.3763  |     |
| 3  | 0.1329   | 0.0335  | 0.0012 | 1.1141 | 0.0242   | 70.5263 | 0.0697 | 6.9679  | 0.0333  |     |
| 4  | 1.8844   | 0.5369  | 0.2636 | 0.9677 | 0.0198   | 59.1779 | 0.0748 | 7.4849  | 0.5422  |     |
| 5  | -0.1972  | -0.0789 | 0.0076 | 1.3277 | 0.0291   | 70.4925 | 0.1061 | 10.6094 | -0.0801 |     |
| 6  | -0.4552  | -0.1699 | 0.0541 | 1.8193 | 0.0433   | 59.4419 | 0.1224 | 12.2405 | -0.1825 |     |
| 7  | -0.1428  | -0.0308 | 0.0010 | 1.0635 | 0.0238   | 71.1809 | 0.0381 | 3.8100  | -0.0306 |     |
| 8  | -0.1335  | -0.0584 | 0.0043 | 1.3453 | 0.0296   | 70.0482 | 0.1073 | 10.7290 | -0.0594 |     |
| 9  | 0.1596   | 0.0401  | 0.0016 | 1.1071 | 0.0241   | 70.5214 | 0.0667 | 6.6720  | 0.0400  |     |
| 10 | -3.6755  | -1.0045 | 0.8176 | 0.8454 | 0.0163   | 50.0223 | 0.0789 | 7.8918  | -1.0231 | *   |
| 11 | 2.4903   | 0.7525  | 0.4618 | 0.8641 | 0.0167   | 50.7933 | 0.0819 | 8.1856  | 0.7621  | *   |
| 12 | -0.0105  | -0.0054 | 0      | 1.0952 | 0.0240   | 70.9597 | 0.0581 | 5.8137  | -0.0054 |     |

**Supplementary Table 9. Leave-one-out analysis for prevalence of obesity in seafarers.**

|    | estimate | zval     | pval | ci.lb  | ci.ub  | Q        | Qp | tau2   | I2      | H2      |
|----|----------|----------|------|--------|--------|----------|----|--------|---------|---------|
| 1  | 0.1871   | -6.4865  | 0    | 0.1287 | 0.2641 | 727.9867 | 0  | 0.5396 | 98.6263 | 72.7987 |
| 2  | 0.1967   | -6.2767  | 0    | 0.1362 | 0.2753 | 731.8109 | 0  | 0.5289 | 98.6335 | 73.1811 |
| 3  | 0.1978   | -6.4731  | 0    | 0.1389 | 0.2736 | 735.0973 | 0  | 0.4942 | 98.6396 | 73.5097 |
| 4  | 0.1808   | -6.9609  | 0    | 0.1260 | 0.2524 | 705.2348 | 0  | 0.4949 | 98.5820 | 70.5235 |
| 5  | 0.1944   | -6.1353  | 0    | 0.1328 | 0.2754 | 736.1966 | 0  | 0.5662 | 98.6417 | 73.6197 |
| 6  | 0.1925   | -5.5758  | 0    | 0.1259 | 0.2830 | 470.2181 | 0  | 0.7016 | 97.8733 | 47.0218 |
| 7  | 0.1754   | -7.2801  | 0    | 0.1230 | 0.2440 | 709.2682 | 0  | 0.4767 | 98.5901 | 70.9268 |
| 8  | 0.1822   | -6.4377  | 0    | 0.1236 | 0.2603 | 629.4393 | 0  | 0.5735 | 98.4113 | 62.9439 |
| 9  | 0.1950   | -6.5360  | 0    | 0.1367 | 0.2704 | 737.7781 | 0  | 0.4970 | 98.6446 | 73.7778 |
| 10 | 0.1599   | -12.8789 | 0    | 0.1288 | 0.1968 | 221.5430 | 0  | 0.1595 | 95.4862 | 22.1543 |
| 11 | 0.1884   | -6.6075  | 0    | 0.1309 | 0.2636 | 735.8840 | 0  | 0.5139 | 98.6411 | 73.5884 |
| 12 | 0.1834   | -6.8881  | 0    | 0.1280 | 0.2556 | 728.0904 | 0  | 0.4953 | 98.6265 | 72.8090 |

**Supplementary Table 10. Leave-one-out diagnostics with a built-in function in obesity prevalence among seafarers.**

|    | rstudent | dffits  | cook.d | cov.r  | tau2.del | QE.del   | hat    | weight | dfbs    | inf |
|----|----------|---------|--------|--------|----------|----------|--------|--------|---------|-----|
| 1  | -0.1209  | -0.0355 | 0.0014 | 1.2114 | 0.5396   | 727.9867 | 0.0854 | 8.5361 | -0.0355 |     |
| 2  | -1.0612  | -0.3216 | 0.1126 | 1.1879 | 0.5289   | 731.8109 | 0.0849 | 8.4889 | -0.3219 |     |
| 3  | -1.2567  | -0.3669 | 0.1370 | 1.1056 | 0.4942   | 735.0973 | 0.0785 | 7.8465 | -0.3667 |     |
| 4  | 0.5504   | 0.1668  | 0.0284 | 1.1134 | 0.4949   | 705.2348 | 0.0839 | 8.3920 | 0.1669  |     |
| 5  | -0.8111  | -0.2456 | 0.0703 | 1.2690 | 0.5662   | 736.1966 | 0.0858 | 8.5781 | -0.2461 |     |
| 6  | -0.5795  | -0.1730 | 0.0433 | 1.5619 | 0.7016   | 470.2181 | 0.0873 | 8.7302 | -0.1742 |     |
| 7  | 1.1980   | 0.3490  | 0.1200 | 1.0678 | 0.4767   | 709.2682 | 0.0785 | 7.8478 | 0.3492  |     |
| 8  | 0.3626   | 0.1129  | 0.0151 | 1.2856 | 0.5735   | 629.4393 | 0.0865 | 8.6511 | 0.1133  |     |
| 9  | -0.9568  | -0.2803 | 0.0804 | 1.1122 | 0.4970   | 737.7781 | 0.0790 | 7.9044 | -0.2802 |     |
| 10 | 4.8801   | 1.5138  | 0.7876 | 0.3921 | 0.1595   | 221.5430 | 0.0854 | 8.5405 | 1.4848  | *   |
| 11 | -0.2545  | -0.0761 | 0.0061 | 1.1541 | 0.5139   | 735.8840 | 0.0836 | 8.3645 | -0.0761 |     |
| 12 | 0.2797   | 0.0835  | 0.0071 | 1.1112 | 0.4953   | 728.0904 | 0.0812 | 8.1199 | 0.0835  |     |

**Supplementary Table 11. Leave-one-out analysis for prevalence of diabetes mellitus in seafarers.**

|   | estimate | zval    | pval | ci.lb  | ci.ub  | Q       | Qp | tau2   | I2      | H2      |
|---|----------|---------|------|--------|--------|---------|----|--------|---------|---------|
| 1 | 0.1029   | -6.1060 | 0    | 0.0541 | 0.1869 | 42.9332 | 0  | 0.4344 | 93.0124 | 14.3111 |
| 2 | 0.1079   | -5.0890 | 0    | 0.0509 | 0.2144 | 46.9716 | 0  | 0.6149 | 93.6132 | 15.6572 |
| 3 | 0.1558   | -6.7351 | 0    | 0.1014 | 0.2318 | 30.2618 | 0  | 0.2117 | 90.0865 | 10.0873 |
| 4 | 0.1025   | -5.6180 | 0    | 0.0508 | 0.1958 | 42.1483 | 0  | 0.5241 | 92.8823 | 14.0494 |
| 5 | 0.1684   | -7.4756 | 0    | 0.1175 | 0.2353 | 22.0728 | 0  | 0.1468 | 86.4086 | 7.3576  |

**Supplementary Table 12. Leave-one-out diagnostics with a built-in function in diabetes mellitus prevalence among seafarers.**

|   | rstudent | dffits  | cook.d | cov.r  | tau2.del | QE.del  | hat    | weight  | dfbs    | inf |
|---|----------|---------|--------|--------|----------|---------|--------|---------|---------|-----|
| 1 | 1.2581   | 0.7506  | 0.7708 | 1.7088 | 0.4344   | 42.9332 | 0.2197 | 21.9663 | 0.7582  |     |
| 2 | 0.6612   | 0.4885  | 0.4624 | 2.3395 | 0.6149   | 46.9716 | 0.2272 | 22.7195 | 0.5018  |     |
| 3 | -1.9621  | -0.9951 | 0.7672 | 0.8551 | 0.2117   | 30.2618 | 0.1669 | 16.6910 | -1.0308 |     |
| 4 | 1.0924   | 0.6949  | 0.7983 | 2.0264 | 0.5241   | 42.1483 | 0.2258 | 22.5775 | 0.7092  |     |
| 5 | -3.0517  | -1.5191 | 1.4814 | 0.6201 | 0.1468   | 22.0728 | 0.1605 | 16.0457 | -1.6611 | *   |

**Supplementary Table 13. Leave-one-out analysis for prevalence of alcohol consumption in seafarers.**

|    | estimate | zval    | pval   | ci.lb  | ci.ub  | Q         | Qp | tau2   | I2      | H2       |
|----|----------|---------|--------|--------|--------|-----------|----|--------|---------|----------|
| 1  | 0.4128   | -0.6735 | 0.5006 | 0.2013 | 0.6622 | 2161.3508 | 0  | 2.4488 | 99.6299 | 270.1689 |
| 2  | 0.4211   | -0.6198 | 0.5354 | 0.2101 | 0.6655 | 2153.3648 | 0  | 2.3560 | 99.6285 | 269.1706 |
| 3  | 0.3494   | -1.2519 | 0.2106 | 0.1686 | 0.5870 | 1841.0286 | 0  | 2.2039 | 99.5655 | 230.1286 |
| 4  | 0.4114   | -0.6491 | 0.5163 | 0.1916 | 0.6733 | 2053.1664 | 0  | 2.7240 | 99.6104 | 256.6458 |
| 5  | 0.4283   | -0.5753 | 0.5651 | 0.2188 | 0.6671 | 1732.8530 | 0  | 2.2518 | 99.5383 | 216.6066 |
| 6  | 0.3824   | -0.8825 | 0.3775 | 0.1760 | 0.6422 | 2197.7499 | 0  | 2.6375 | 99.6360 | 274.7187 |
| 7  | 0.3398   | -1.3233 | 0.1857 | 0.1614 | 0.5792 | 2121.5515 | 0  | 2.2544 | 99.6229 | 265.1939 |
| 8  | 0.3334   | -1.6516 | 0.0986 | 0.1802 | 0.5323 | 1262.2314 | 0  | 1.5668 | 99.3662 | 157.7789 |
| 9  | 0.4388   | -0.4945 | 0.6210 | 0.2276 | 0.6747 | 1951.2399 | 0  | 2.2142 | 99.5900 | 243.9050 |
| 10 | 0.3472   | -1.2514 | 0.2108 | 0.1652 | 0.5884 | 2120.4848 | 0  | 2.2767 | 99.6227 | 265.0606 |

**Supplementary Table 14. Leave-one-out diagnostics with a built-in function in alcohol consumption prevalence in seafarers.**

|    | rstudent | dffits  | cook.d | cov.r  | tau2.del | QE.del    | hat    | weight  | dfbs    | inf |
|----|----------|---------|--------|--------|----------|-----------|--------|---------|---------|-----|
| 1  | -0.6798  | -0.2271 | 0.0551 | 1.1869 | 2.4488   | 2161.3508 | 0.1001 | 10.0108 | -0.2271 |     |
| 2  | -0.9068  | -0.3021 | 0.0938 | 1.1418 | 2.3560   | 2153.3648 | 0.0997 | 9.9749  | -0.3021 |     |
| 3  | 0.9945   | 0.3324  | 0.1063 | 1.0692 | 2.2039   | 1841.0286 | 0.1003 | 10.0328 | 0.3324  |     |
| 4  | -0.6090  | -0.2044 | 0.0496 | 1.3199 | 2.7240   | 2053.1664 | 0.1005 | 10.0483 | -0.2044 |     |
| 5  | -1.1088  | -0.3704 | 0.1348 | 1.0925 | 2.2518   | 1732.8530 | 0.1005 | 10.0463 | -0.3704 |     |
| 6  | 0.0840   | 0.0272  | 0.0009 | 1.2781 | 2.6375   | 2197.7499 | 0.1003 | 10.0333 | 0.0272  |     |
| 7  | 1.2609   | 0.4174  | 0.1714 | 1.0916 | 2.2544   | 2121.5515 | 0.0987 | 9.8735  | 0.4174  |     |
| 8  | 1.6992   | 0.5725  | 0.2244 | 0.7625 | 1.5668   | 1262.2314 | 0.1004 | 10.0404 | 0.5720  |     |
| 9  | -1.3916  | -0.4640 | 0.2080 | 1.0739 | 2.2142   | 1951.2399 | 0.1001 | 10.0120 | -0.4639 |     |
| 10 | 1.0448   | 0.3469  | 0.1196 | 1.1030 | 2.2767   | 2120.4848 | 0.0993 | 9.9277  | 0.3469  |     |
